# Supplementary material
Source: publisher figshare collection journal article supplement (https://acs.figshare.com/ndownloader/files/29023523)
Supplement: Supplementary file 1 [file 29023523]

## Supporting Information

### ***Lactobacillus rhamnosus* LRa05 ameliorate hyperglycemia through regulating glucagon-mediated signaling pathway and gut microbiota in type 2 diabetic mice**

Tao Wu<sup>#,\*</sup>, Yongli Zhang<sup>#</sup>, Wen Li<sup>#</sup>, Yunjiao Zhao<sup>#</sup>, Hairong Long<sup>#,†</sup>, Esther Mwizerwa Muhindo<sup>#</sup>,  
Rui Liu<sup>#</sup>, Wenjie Sui<sup>#</sup>, Qian Li<sup>§</sup>, Min Zhang<sup>#,§,\*</sup>

<sup>#</sup>*State Key Laboratory of Food Nutrition and Safety, Ministry of Education & Tianjin Key Laboratory of Food Nutrition and Safety, Food Biotechnology Engineering Research Center of Ministry of Education, Tianjin University of Science & Technology, Tianjin 300457, China*

<sup>†</sup>*Guangxi Botanical Garden of Medicinal Plants, Nanning, Guangxi, 530023, China*

<sup>§</sup>*Tianjin Agricultural University, Tianjin 300384, China*

Corresponding Author: \*Tao Wu, [wutao@tust.edu.cn](mailto:wutao@tust.edu.cn), Min Zhang, [zm0102@sina.com](mailto:zm0102@sina.com)

## **Materials and Methods**

### **Evaluation of oxidative stress parameters**

**Reactive oxygen species (ROS) detection:** Briefly, OCT-embedded tissue was cut into 4- $\mu$ m-thick sections. Tissue sections were incubated with 5 $\mu$ M of DHE for 30 min at 37 °C away from light, and then the sections were coverslipped. The ethidium fluorescence was viewed immediately at Ex535/Em610 with a confocal microscope (Leica TCS SP5 II, Leica Microsystems). The quantitative data of liver ROS were analyzed using Image J software.

### **16S rRNA Gene Sequencing**

The obtained tags were grouped into operational taxonomic units (OTUs) by UPARSE software with a 97% threshold. These OTUs were analyzed by using Mothur method and SILVA138 (<http://www.arb-silva.de/>) of SSUrRNA database for species annotation analysis (set the threshold of 0.8 ~ 1), which obtained taxonomic information (phylum and genus). The Venn Diagram was drawn by R software (version 3.0.3). The observed-species, Simpson, ACE, and Chao1 index were analyzed by using QIIME software (version 1.7.0). Besides, QIIME software (version 1.9.1) was used to analyze the  $\beta$ -diversity. The principal coordinates analysis (PCoA) was calculated and visualized by R (version 2.15.3), stats, and ggplot2 software package. Linear discriminant analysis (LDA) effect size analysis (LEfSe) was used to reveal the most differentially abundant taxa over-represented in gut microbiota. The heatmap of the top 30 most abundant genus was portrayed using R software

(pheatmap package). A heatmap indicated the relationship between the colonic gut microbiota and the host's genes related to glucagon signaling pathway was were plotted by R packages.

**Table S1**

Primers sequences for quantitative real time PCR.

| Gene   | Primer         | Sequence (5'-3')       | Size(bp) | Annealing temperature (°C) |
|--------|----------------|------------------------|----------|----------------------------|
| GCG    | forward primer | GCCACTCACAGGGCACATTC   | 303      | 60                         |
|        | reverse primer | CAGAGAAGGAGCCATCAGCG   |          |                            |
| GCGR   | forward primer | CCTGGGTGGTGGTCAAGTGTC  | 228      | 60                         |
|        | reverse primer | GAGGGATGAGGGTCAGCGTG   |          |                            |
| Gnas   | forward primer | TGATGAGTCGGAAGAAGGGG   | 172      | 60                         |
|        | reverse primer | GAGGGATCGTGATCGGGTAC   |          |                            |
| PKA    | forward primer | TTGGAAGGTTCAAGTGAGCCC  | 262      | 60                         |
|        | reverse primer | CACCAGTCCACCGCCTTATT   |          |                            |
| CRTC2  | forward primer | ACATCGGCTCCACACGGTT    | 214      | 60                         |
|        | reverse primer | GGGGACACCATTTCTGCGG    |          |                            |
| PEPCK  | forward primer | GGATGTTTCGGGCGGATTG    | 207      | 60                         |
|        | reverse primer | TTTCGTAAGGGAGGTCGGTG   |          |                            |
| G6Pase | forward primer | GTGATTGCTGACCTGAGGAACG | 95       | 60                         |
|        | reverse primer | ACTGCCACCCAGAGGAGATTG  |          |                            |
| GLUT 2 | forward primer | GGTGGCTCGGGGACAACT     | 123      | 60                         |
|        | reverse primer | CAGCAATGATGAGGGCGTGT   |          |                            |
| GAPDH  | forward primer | TTCAGCTCTGGGATGACCTT   | 129      | 60                         |
|        | reverse primer | TGCCACTCAGAAGACTGTGG   |          |                            |

GCG, glucagon; GCGR, glucagon receptor; Gnas, gene encodes the heterotrimeric Gs protein alpha-subunit; cAMP, cellular adenosine-3'-5'-cyclic monophosphate; PKA, cAMP-dependent protein kinase; CREB, cAMP response element-binding protein; CRTC2, CREB-regulated transcriptional coactivator 2; PEPCK, phosphoenolpyruvate carboxykinase; G6Pase, glucose-6-phosphatase; GLUT 2, glucose transporter 2; GAPDH, glyceraldehyde-3-phosphate dehydrogenase;

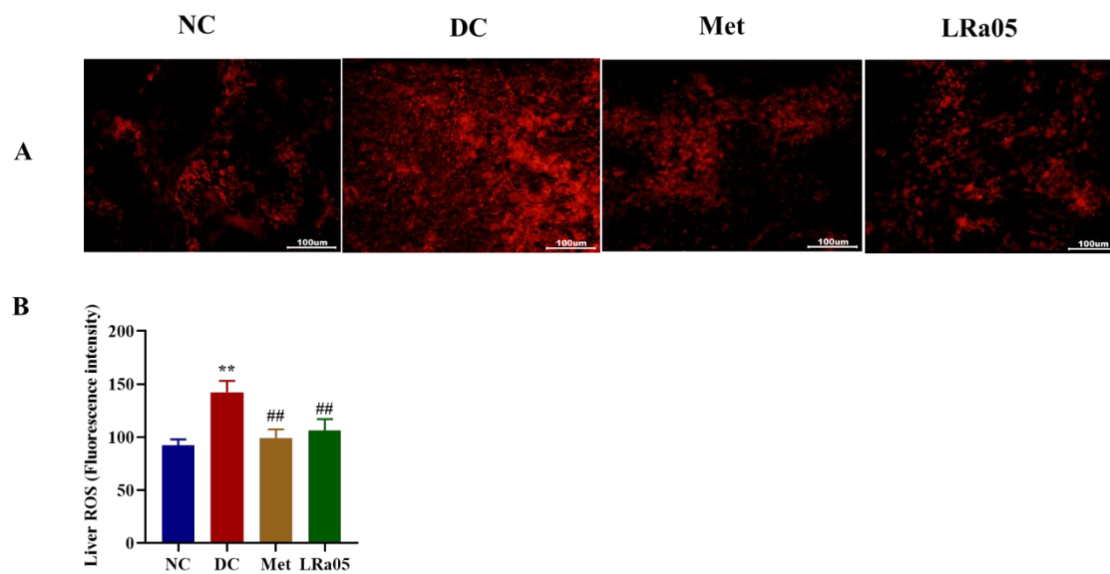

**Fig. S1.** Effect of LRa05 on relieving liver ROS. ROS (A), detected by DHE staining ( $\times 100$ ); Liver ROS (Fluorescence intensity) (B), analyzed using Image J software. Data expressed as mean  $\pm$  SD. \*\* $p < 0.01$  vs. NC group. ## $p < 0.01$  vs. DC group.

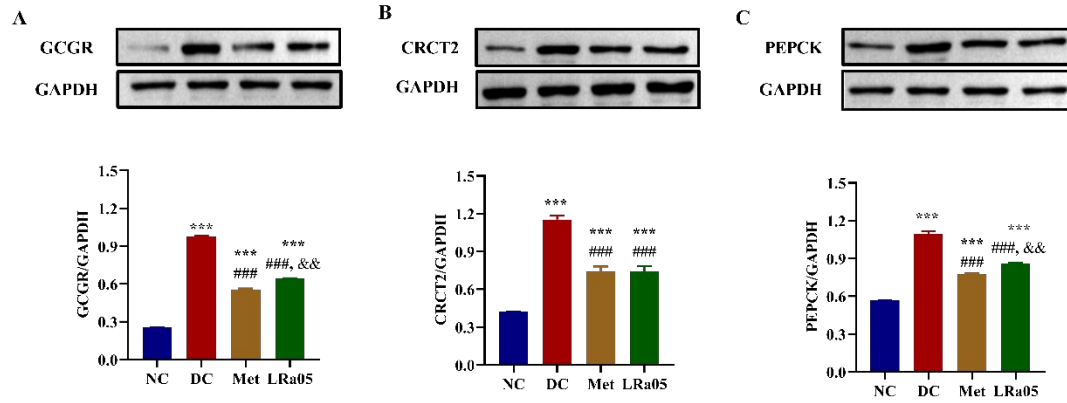

**Fig. S2.** Effects of LRa05 on the expression of key proteins in the glucagon-mediated signaling pathway in the liver of T2DM mice. Protein expression of GCGR (A), protein expression of CRCT2 (B), protein expression of PEPCK (C). Data expressed as mean  $\pm$  SD. \*\*\* $p$ <0.001 vs. NC group. ### $p$ <0.001 vs. DC group. && $p$ <0.05 vs Met group.
